# Supplementary material for: Characterization of a high-resolution breath acetone meter for ketosis monitoring
Source: PubMed Central journal article supplement (PMC7520093; doi:10.7717/peerj.9969), 2020-09-24
Supplement: peerj-08-9969-s008.pdf [file peerj-08-9969-s008.pdf]

1 In addition to parts per million (ppm), the PBAM also reports breath acetone results in units called  
 2 ACEs, which are designed to translate parts per million (ppm) of breath acetone into a blood BHB  
 3 equivalent. As blood BHB and breath acetone are enzymatically and non-enzymatically converted from  
 4 AcAc, and breath acetone is additionally dependent on blood-gas partitioning, the relationship between  
 5 breath acetone and BHB is nonlinear. Based on the literature and our own data the relationship can be  
 6 described by a function of the form:

$$1 \text{ ACEs} = 10 * \text{BHB} = Ax^B + C,$$

7 where  $x$  is breath acetone in ppm and  $A$ ,  $B$  and  $C$  are device-independent coefficients.

8 Figure 1 shows the performance of three calibrated PBAMs upon repeated exposure to the laboratory  
 9 acetone standards in units of ACEs.

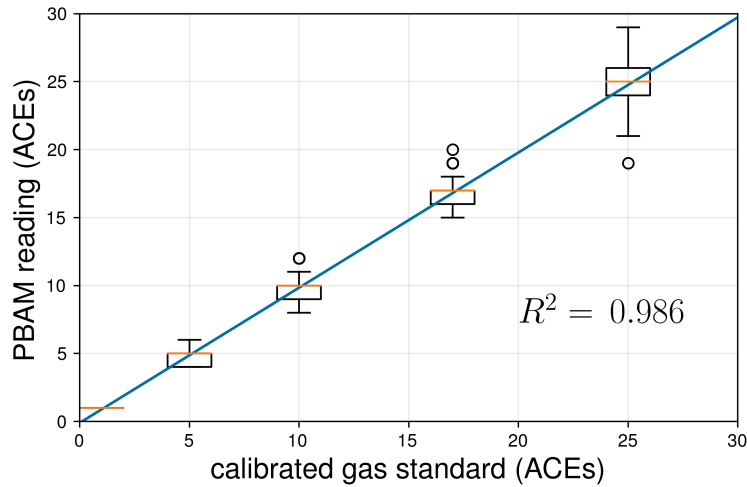

**Figure 1.** Performance of three calibrated PBAM's against a laboratory gas standard. The readings from the PBAM and the gas standard were linearly correlated with an  $R^2$  of 0.986. The orange line indicates the median and the box edges represent the 25th quartile ( $Q_1$ ) and 75th quartile ( $Q_3$ ) for each gas concentration. The box width represents the interquartile range ( $IQR = Q_3 - Q_1$ ). The upper and lower whiskers represent the last datum less than  $Q_3 + 1.5 * IQR$  and the first datum greater than  $Q_1 - 1.5 * IQR$ , respectively. Finally, the open circles represent data beyond  $Q_3 + 1.5 * IQR$  and  $Q_1 - 1.5 * IQR$ .

10 Figure 2 shows the correlation between coincident breath acetone (ACEs) and blood BHB measure-  
 11 ments (n=1,214).

12 Figure 3 shows the correlation between DKEs for breath acetone (ACEs) and blood BHB (n=248).

13 Figure 4 demonstrates the temporal lag between blood BHB and breath acetone (ACEs).

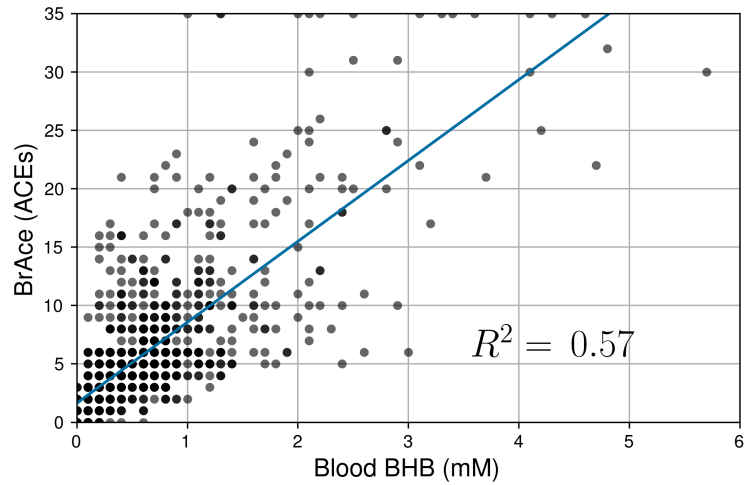

**Figure 2.** Correlation of coincident breath acetone (ACEs) and blood BHB measurements (n=1,214). The gray and black dots represent individual and multiple overlapping data points, respectively. BrAce and blood BHB are linearly correlated with  $R^2 = 0.57$  ( $P < 0.0001$ ). This correlation coefficient is similar to literature reported values whose weighted mean is 0.64.

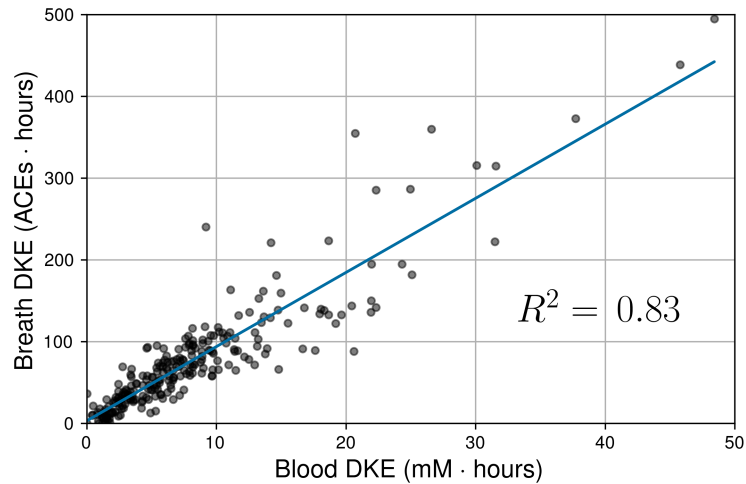

**Figure 3.** Correlation between daily ketone exposures (DKEs) as measured by breath acetone (ACEs) and blood BHB. Each data point represents one subject-day during the trial. The gray and black dots represent individual and multiple overlapping data points, respectively. Blood and breath DKEs were highly correlated ( $R^2 = 0.83$ ,  $P < 0.0001$ ,  $n=248$ ).

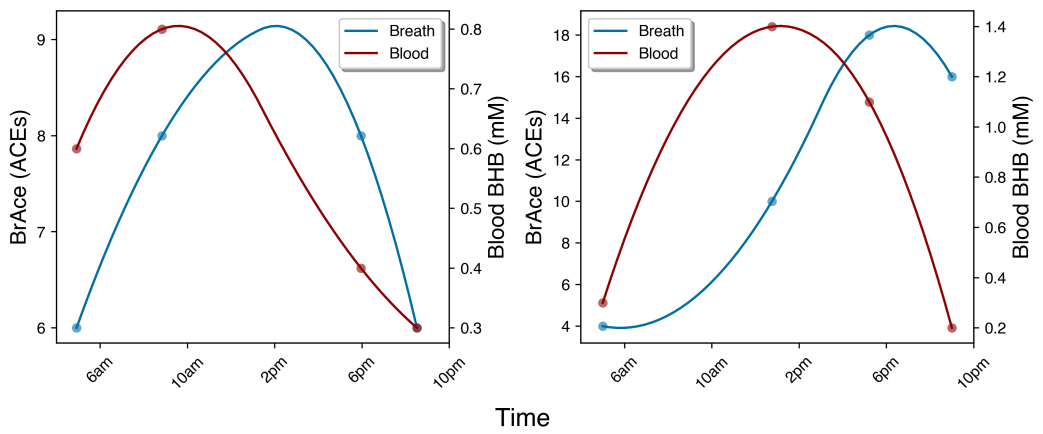

**Figure 4.** Examples of the temporal lag between blood BHB and breath acetone (ACEs). Both examples demonstrate a lag of approximately 4 hours between peak concentrations of blood BHB and breath acetone. This time lag effectively decreases the point-to-point correlation coefficient.
